# Supplementary material
Source: PubMed Central journal article supplement (PMC6494701)
Supplement: NIHMS1511401-supplement-1.pdf [file NIHMS1511401-supplement-1.pdf]

## **Online Supplementary Information**

### **Neonatal Bloodspot DNA Methylation Patterns are Associated with Childhood Weight Status in the Healthy Families Project**

**Running Title:** Bloodspot DNA Methylation and Obesity

Joseph Kochmanski<sup>1</sup>, Jaclyn M. Goodrich<sup>1</sup>, Karen E. Peterson<sup>2</sup>, Julie C. Lumeng<sup>3</sup>, Dana C. Dolinoy<sup>\*,1,2</sup>

<sup>1</sup>Environmental Health Sciences, University of Michigan  
Ann Arbor, MI 48109, U.S.A.

<sup>2</sup>Nutritional Sciences, University of Michigan  
Ann Arbor, MI 48109, U.S.A.

<sup>3</sup>Department of Pediatrics, University of Michigan  
Ann Arbor, MI 48109, U.S.A.

**\*Corresponding Author:**

Dana C. Dolinoy, [ddolinoy@umich.edu](mailto:ddolinoy@umich.edu)

[Phone: \(734\) 647-3155](tel:(734)647-3155)

Environmental Health Sciences & Nutritional Sciences, University of Michigan  
School of Public Health, 1415 Washington Heights  
Ann Arbor, MI 48109, U.S.A.

| Variables                           | 12-24 months<br>(n=40) |       | 3-5 years (n=40) |       | 10-12 years (n=52) |       |
|-------------------------------------|------------------------|-------|------------------|-------|--------------------|-------|
|                                     | Count<br>(n)           | (%)   | Count<br>(n)     | (%)   | Count<br>(n)       | (%)   |
| <b>Neonatal Bloodspots</b>          | 40                     | -100  | 40               | -100  | 52                 | -100  |
| <b>Childhood Blood Draws</b>        | 19                     | -47.5 | 26               | -65   | 20                 | -38.5 |
| <b>Child Gender</b>                 |                        |       |                  |       |                    |       |
| Male                                | 20                     | -50   | 22               | -55   | 28                 | -54   |
| Female                              | 20                     | -50   | 18               | -45   | 24                 | -46   |
| <b>Child Race*</b>                  |                        |       |                  |       |                    |       |
| White                               | 24                     | -60   | 31               | -77.5 | 38                 | -73.1 |
| Black                               | 6                      | -15   | 7                | -17.5 | 9                  | -17.3 |
| American Indian or<br>Alaska Native | 0                      | 0     | 0                | 0     | 1                  | 0     |
| Asian or Pacific<br>Islander        | 8                      | -20   | 1                | -2.5  | 1                  | -1.9  |
| Biracial                            | 2                      | -5    | 1                | -2.5  | 3                  | -5.7  |
| Other                               | 0                      | 0     | 0                | 0     | 0                  | 0     |
| <b>Child Ethnicity</b>              |                        |       |                  |       |                    |       |
| Hispanic or Latino                  | 4                      | -10   | 2                | -5    | 2                  | -3.8  |
| Not hispanic or<br>latino           | 36                     | -90   | 38               | -95   | 50                 | -96.2 |
| <b>Maternal education</b>           |                        |       |                  |       |                    |       |
| Did not complete<br>High School     | 6                      | -15   | 1                | -2.5  | 4                  | -7.7  |
| Graduated High<br>School            | 4                      | -10   | 2                | -5    | 9                  | -17.3 |
| Completed GED                       | 1                      | -2.5  | 0                | 0     | 1                  | -1.9  |
| Have some college<br>courses        | 9                      | -22.5 | 10               | -25   | 13                 | -25   |
| Completed a 2-<br>year degree       | 7                      | -17.5 | 6                | -15   | 7                  | -13.4 |
| Completed a 4-<br>year degree       | 13                     | -32.5 | 21               | -52.5 | 18                 | -34.6 |

\*p&lt;0.05

**Table S1 - Healthy Families Demographics by Age Group.** Based on consent, a subset of n=65 children provided later-life blood draw samples for longitudinal follow-up. By age group,

19 toddlers, 26 pre-schoolers, and 20 school-aged children consented to a childhood blood draw. For the child race/ethnicity and maternal education variables, a chi-squared test of equal proportions was used to check for significant deviations from the total population. Child race showed a significant change in proportion ( $p=0.013$ ) in the toddler (12-24 months) age group compared to the total population. Ethnicity and maternal education variables did not significantly differ by age group.

Table S1 – Pyrosequencing primer sequences and PCR conditions.

| Assay                | LINE-1                                              | IGF2 <sup>1</sup>                                    | H19 <sup>1</sup>                                                                    | PPARA                                                                             | LEP <sup>2</sup>                                                        | ESR1                                                                                    | SREBF1 <sup>3</sup>                                                                                                                            |
|----------------------|-----------------------------------------------------|------------------------------------------------------|-------------------------------------------------------------------------------------|-----------------------------------------------------------------------------------|-------------------------------------------------------------------------|-----------------------------------------------------------------------------------------|------------------------------------------------------------------------------------------------------------------------------------------------|
| Location (hg19)      | Repetitive Element                                  | chr11: 2169499;<br>chr11: 2169515;<br>chr11: 2169518 | chr11:<br>2024254;<br>chr11:<br>2024257;<br>chr11:<br>2024259;<br>chr11:<br>2024261 | chr22: 46545064;<br>chr22: 46545083                                               | chr7:<br>127881127;<br>chr7:<br>127881129;<br>chr7:1278811<br>3         | chr6:<br>152128834;<br>chr6:<br>152128841;<br>chr6:<br>152128845;<br>chr6:<br>152128868 | chr17:<br>17723203;<br>chr17:<br>17723288;<br>chr17:<br>17723297;<br>chr17:<br>17723305                                                        |
| Forward PCR Primer   | 5'-<br>TTGAGTTAGGT<br>GTGGGATATAG<br>TT-3'          | 5'-<br>GGAGGGGGTTTA<br>TTTTTTTAGGAAG<br>-3'          | 5'-<br>TTTGTGGATT<br>TTATTAAGGG<br>AG-3'                                            | 5'-<br>GGAGGTTTTTATG<br>AGGATGTAGTT-3'                                            | 5'-<br>GAGTTTTTGG<br>AGGGATATT<br>AAGGAT-3'                             | 5'-<br>GTTGGAGGT<br>TAGGGAGTT<br>TAGGA-3'                                               | 5'-<br>TTTGTTTGGG<br>TTTTGATGTA<br>AATGTA-3'                                                                                                   |
| Reverse PCR Primer   | 5'-[Biotin]-<br>CAAAAAATCAA<br>AAAATTCCTTT<br>CC-3' | 5'-[Biotin]-<br>AACCCCAACAAAA<br>ACCACTAAACAC-<br>3' | 5'-[Biotin]-<br>CTATAAATAA<br>ACCCCAACCA<br>AAC-3'                                  | 5'-[Biotin]-<br>ACACATATTAACC<br>ACAATAACTATC<br>AT-3'                            | 5'-[Biotin]-<br>CAAAATTATA<br>TAAAACCCTA<br>TAACCTACCA<br>-3'           | 5'-[Biotin]-<br>CTAACCCCC<br>ACCCTACCC<br>C-3'                                          | 5'-[Biotin]-<br>ATTCAACTCC<br>ACCCCTATAT<br>TAAACTAC-3'                                                                                        |
| Sequencing Primer    | 5'-<br>AGGTGTGGATA<br>TAGT-3'                       | 5'-<br>GGGGTTTATTTTT<br>TTAGGA-3'                    | 5'-<br>GTGTGGAATT<br>AGAAGT-3'                                                      | 5'-<br>GGATGTGGTTGTT<br>TG-3'                                                     | 5'-<br>GGGAGGTAT<br>TTAAGGG-3';<br>5'-<br>GGGAGGGGA<br>GGGAGTTGG-<br>3' | 5'-<br>GGTTAGGG<br>AGTTTAGGA<br>G-3'                                                    | 5'-<br>GTATTGGTTT<br>TAAGTTAGG<br>TT-3'                                                                                                        |
| Sequence to Analyze  | TTYGTGGTGYGT<br>YGTTTTTAAGT<br>YGGTTTGAAAA<br>G     | AGTATAGTTAYGT<br>YGTTTTTATTGG<br>TTTTYGTAAAGTAG<br>A | GGTYGYGYG<br>GYGGTAGTGT<br>AGGTTTATAT<br>A TTATAGTT                                 | TATATTTTAYGAG<br>ATATGTAGGATAT<br>TAYGTGTATAGGT<br>T<br>ATTTTATAAATTTT<br>GAAATAA | TGYGYGYGTG<br>GTTTTTGGHG                                                | TTGGYGGAG<br>GGYTTYGT<br>TT<br>TGGGATTGT<br>ATTTGTTTTY<br>GT                            | TTTAGTGYGA<br>GGTTGYGTTT<br>ATTTYGGTAA<br>TAAGTATATT<br>AGGATTGTT<br>AGTAATAGG<br>GT<br>ATTTAAGTA<br>GTYGAGTGG<br>A<br>GTTTTAGTTT<br>TTAAGTTTG |
| Amplicon Length (bp) | ~150 bp                                             | 93                                                   | 145                                                                                 | 198                                                                               | 383                                                                     | 119                                                                                     | 293                                                                                                                                            |

|                                   |          |     |     |          |          |          |           |
|-----------------------------------|----------|-----|-----|----------|----------|----------|-----------|
| <b>Annealing Temperature (°C)</b> | 55       | 55  | 51  | 54.5     | 52       | 58/56*   | 56        |
| <b>Number of Cycles</b>           | 48       | 50  | 50  | 48       | 50       | 15/29*   | 44        |
| <b>Number of CpG Sites</b>        | 4        | 3   | 4   | 2        | 3        | 4        | 4         |
| <b>Location</b>                   | Promoter | DMR | DMR | Promoter | Promoter | Promoter | Gene body |

**Table S2 - Pyrosequencing primer sequences and PCR conditions.** Pyrosequencing primer sequences and PCR conditions. Information for each assay, including genomic location (individual CpGs analyzed), primer sequences (5'-3'), sequence to analyze, amplicon length, annealing temperature, number of cycles, and number of CpG sites measured. Touchdown PCR was used for *ESR1* assay, as indicated by the multiple temperatures and cycle numbers. Location refers to regulatory region where CpG sites are located for each assay. <sup>1</sup> = Assay adapted from Hoyo *et al.*, 2011 and Murphy *et al.*, 2012; <sup>2</sup> = Assay adapted from Lesseur *et al.*, 2013; <sup>3</sup> = Assay adapted from Adaikalakoteswari *et al.*, 2016.

## References

1. Lesseur C, Armstrong DA, Paquette AG, Koestler DC, Padbury JF, Marsit CJ. Tissue-specific Leptin promoter DNA methylation is associated with maternal and infant perinatal factors. *Mol Cell Endocrinol.* 2013; 381:160–7.
2. Adaikalakoteswari A, Finer S, Voyias PD, McCarthy CM, Vatish M, Moore J, Smart-Halajko M, Bawazeer N, Al-Daghri NM, McTernan PG, et al. Vitamin B12 insufficiency induces cholesterol biosynthesis by limiting s-adenosylmethionine and modulating the methylation of SREBF1 and LDLR genes. *Clin Epigenetics* 2015; 7:14.
3. Hoyo, C., Murtha, A. P., Schildkraut, J. M., Jirtle, R., Demark-Wahnefried, W., Forman, M. R., Iversen, E.S., Kurtzberg, J., Overcash, F., Huang, Z., and Murphy, S. K. Methylation variation at IGF2 differentially methylated regions and maternal folic acid use before and during pregnancy. *Epigenetics* 2011; 6: 928–936.
4. Murphy, S. K., Huang, Z., & Hoyo, C. Differentially Methylated Regions of Imprinted Genes in Prenatal, Perinatal and Postnatal Human Tissues. *PLoS ONE* 2012; 7: e40924.



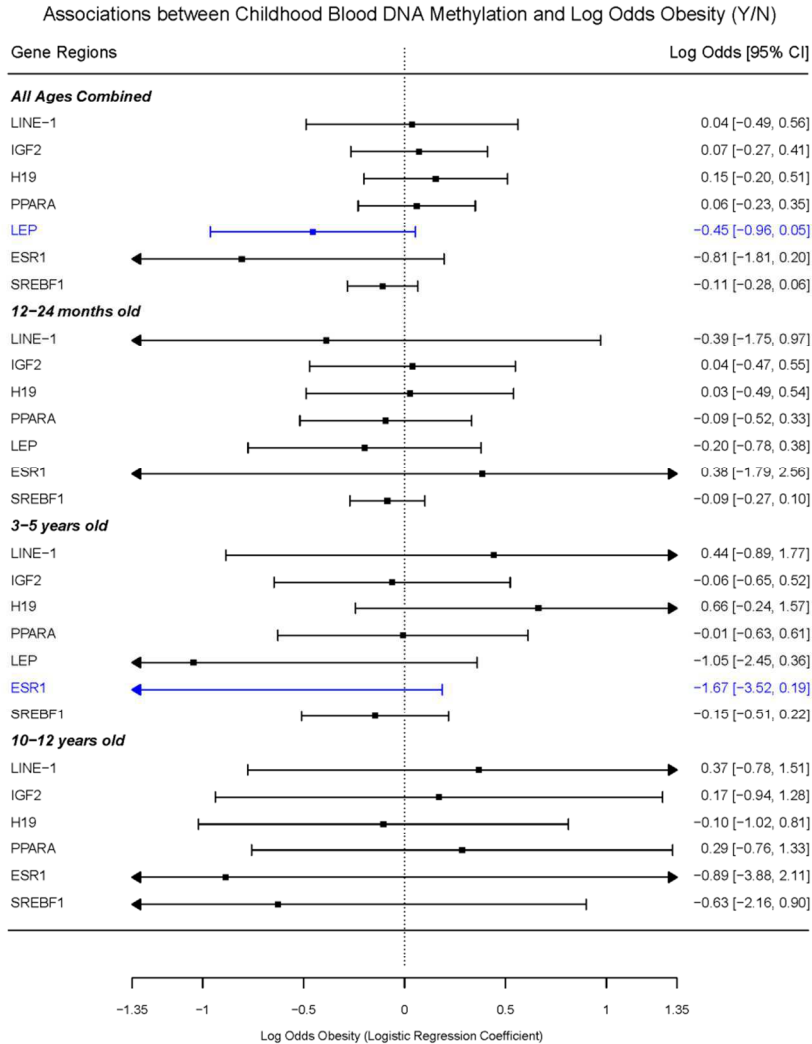

**Figure S1 - Associations between Childhood Blood DNA Methylation and Log Odds Obesity (Y/N).** Forest plot of obesity likelihood by childhood blood draw DNA methylation at investigated target genes. Logistic regression coefficients are represented as log odds of obesity in the right column. The left column shows how the obesity likelihood outcome was grouped by age in the regression models. It also lists all of the target gene methylation predictors included in bloodspot logistic regression models. For the 10-12 year old age group, no *LEP* methylation data was available for obese individuals. Trends that approach significance ( $p < 0.10$ ) are indicated in blue.

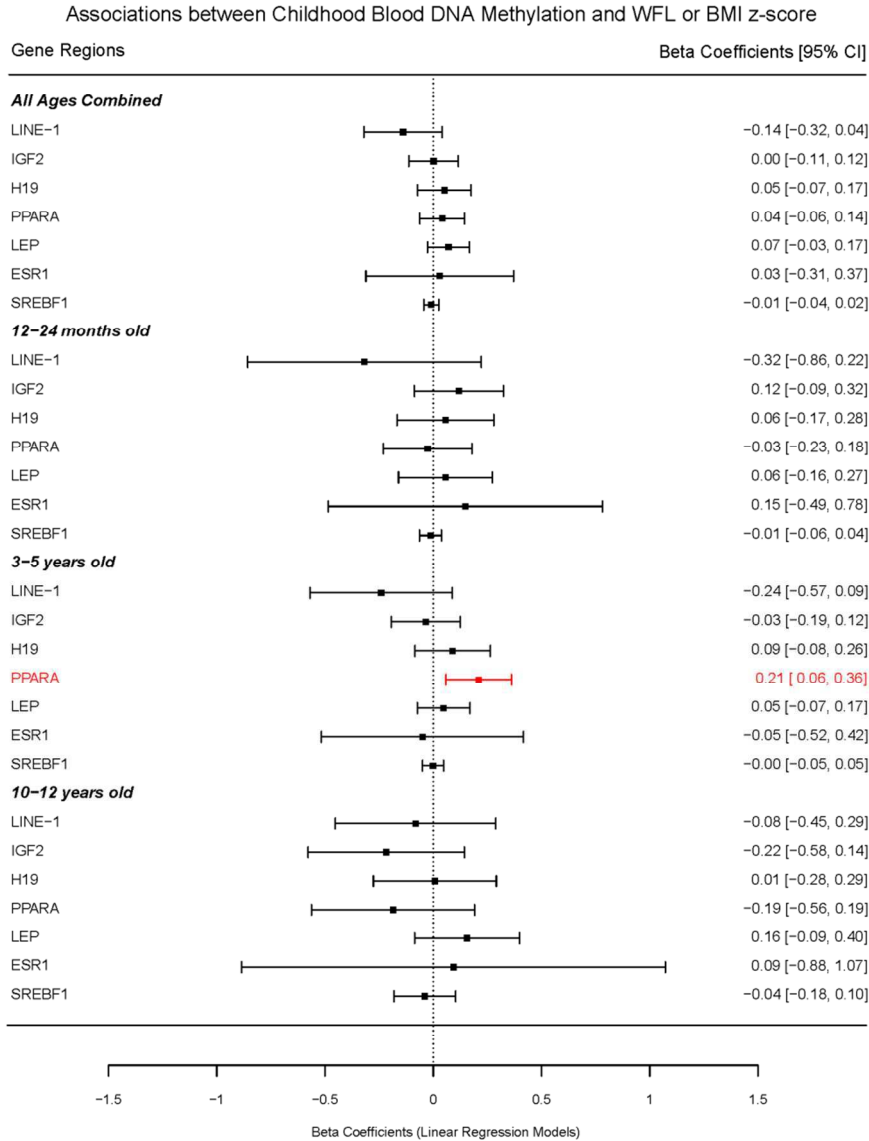

**Figure S2 - Associations between Childhood Blood DNA Methylation and WFL or BMI z-score.** Forest plot of continuous WFL or BMI z-score by childhood blood draw DNA methylation at investigated target genes. Linear regression coefficients are shown in the right column. The left column shows how the regression models were grouped by age. It also lists all of the target gene methylation predictors included in blood logistic regression models. Significant positive association between *PPARA* blood DNA methylation and WFL or BMI z-score ( $p < 0.05$ ) is indicated in red.
